# Supplementary material
Source: HighWire-hosted journal article supplement (https://cmaj.ca/highwire/filestream/68365/field_highwire_adjunct_files/1/161002-res-2-at.pdf)
Supplement: 161002-res-2-at.pdf [file 161002-res-2-at.pdf]

**Appendix 2 (as supplied by the authors):** Smoking status at baseline (2013/14) and follow-up (2014/15) of the COMPASS longitudinal sample, Ontario and Alberta, Canada (n=19,310), n (%)

|                            |                              | Baseline (2013/14)   |                           |               |                 |                 |                          |                              | Total             |
|----------------------------|------------------------------|----------------------|---------------------------|---------------|-----------------|-----------------|--------------------------|------------------------------|-------------------|
|                            |                              | Current Daily Smoker | Current Occasional Smoker | Former Smoker | Experimenter    | Puffer          | Never Tried, susceptible | Never Tried, Not susceptible |                   |
| <b>Follow-up (2014/15)</b> | Current Daily Smoker         | 124<br>(0.64)        | 60<br>(0.31)              | 6<br>(0.03)   | 85<br>(0.44)    | 29<br>(0.15)    | 24<br>(0.12)             | 35<br>(0.18)                 | 363<br>(1.88)     |
|                            | Current Occasional Smoker    | 27<br>(0.14)         | 138<br>(0.71)             | 23<br>(0.12)  | 211<br>(1.09)   | 44<br>(0.23)    | 60<br>(0.31)             | 39<br>(0.20)                 | 542<br>(2.81)     |
|                            | Former Smoker                | 10<br>(0.05)         | 29<br>(0.15)              | 26<br>(0.13)  | 70<br>(0.36)    | 11<br>(0.06)    | 11<br>(0.06)             | 7<br>(0.04)                  | 164<br>(0.85)     |
|                            | Experimenter                 | 6<br>(0.03)          | 20<br>(0.10)              | 26<br>(0.13)  | 869<br>(4.50)   | 439<br>(2.27)   | 467<br>(2.42)            | 283<br>(1.47)                | 2,110<br>(10.93)  |
|                            | Puffer                       | 5<br>(0.03)          | 6<br>(0.03)               | 4<br>(0.02)   | 133<br>(0.69)   | 706<br>(3.66)   | 617<br>(3.20)            | 505<br>(2.62)                | 1,976<br>(10.23)  |
|                            | Never Tried, susceptible     | 8<br>(0.04)          | 7<br>(0.04)               | 2<br>(0.01)   | 40<br>(0.21)    | 135<br>(0.70)   | 2,161<br>(11.19)         | 1,598<br>(8.28)              | 3,951<br>(20.46)  |
|                            | Never Tried, Not susceptible | 12<br>(0.06)         | 3<br>(0.02)               | 3<br>(0.02)   | 39<br>(0.20)    | 160<br>(0.83)   | 1,379<br>(7.14)          | 8,608<br>(44.58)             | 10,204<br>(52.84) |
|                            | <b>Total</b>                 | 192<br>(0.99)        | 263<br>(1.36)             | 90<br>(0.47)  | 1,447<br>(7.49) | 1,524<br>(7.89) | 4,719<br>(24.44)         | 11,075<br>(57.35)            |                   |
